# Supplementary material
Source: PubMed Central journal article supplement (PMC8054830)
Supplement: NIHMS1637640-supplement-1637640_SuppNote.pdf [file NIHMS1637640-supplement-1637640_SuppNote.pdf]

## **Supplementary Note**

**TITLE:** Integrated molecular drivers coordinate biological and clinical states in melanoma

### **AUTHORS**

Jake R. Conway<sup>1,2,3</sup>, Felix Dietlein<sup>2,3</sup>, Amaro Taylor-Weiner<sup>1,2,3</sup>, Saud AlDubayan<sup>2,3,4,5</sup>, Natalie Vokes<sup>2,3</sup>, Tanya Keenan<sup>2,3</sup>, Brendan Reardon<sup>2,3</sup>, Meng Xiao He<sup>2,3,6</sup>, Claire A. Margolis<sup>2,3</sup>, Jason Weirather<sup>7</sup>, Rizwan Haq<sup>7</sup>, Bastian Schilling<sup>8,9</sup>, F. Stephen Hodi<sup>7</sup>, Dirk Schadendorf<sup>9</sup>, David Liu<sup>2,3</sup>, Eliezer M. Van Allen<sup>2,3,7</sup>

### **AFFILIATIONS**

<sup>1</sup>Division of Medical Sciences, Harvard University, Boston, Massachusetts 02115, USA

<sup>2</sup>Cancer Program, Broad Institute of MIT and Harvard, Cambridge, Massachusetts 02142, USA

<sup>3</sup>Department of Medical Oncology, Dana-Farber Cancer Institute, Boston, Massachusetts 02215, USA

<sup>4</sup>Division of Genetics, Brigham and Women's Hospital, Boston, MA 02115, USA

<sup>5</sup>Department of Medicine, King Saud bin Abdul-Aziz University for Health Sciences, Riyadh, Saudi Arabia

<sup>6</sup>Harvard Graduate Program in Biophysics, Boston, MA 02115

<sup>7</sup>Center for Cancer Precision Medicine, Dana-Farber Cancer Institute, Boston, MA 02215, USA

<sup>8</sup>Department of Dermatology, University Hospital Würzburg, Würzburg, Germany

<sup>9</sup>Department of Dermatology, University Hospital, Essen, Germany and German Cancer Consortium of Translational Cancer Research (DKTK), German Cancer Research Center (DKFZ), Heidelberg, Germany

## MuTect1.1.6

### Parameters:

**fractionContamination:** fraction of cross-sample contamination output from ContEst

**downsampleToCoverage:** 99999

**dbSNPVCF:** can be downloaded from dbSNP; used to exclude regions around known polymorphisms

**cosmicVCF:** can be downloaded from COSMIC; catalogue of somatic mutations

**readgroupBlacklist:** list of read groups to exclude

--out, --coverage\_file, and --power\_file are all outputs

### Command line code

```
java -jar -Xmx4g /muTect-1.1.6.jar --analysis_type MuTect -L ${targetsIntervalList} \  
--normal_sample_name ${normalSampleID} -I:normal ${normalBam} \  
--tumor_sample_name ${tumorSampleID} -I:tumor ${tumorBam} \  
--reference_sequence ${refFasta} --normal_panel ${normalPanel} \  
--fraction_contamination ${fractionContamination} \  
--downsample_to_coverage ${downsampleToCoverage} \  
--dbsnp ${dbSNPVCF} --cosmic ${cosmicVCF} \  
--read_group_black_list ${readgroupBlacklist} \  
--enable_extended_output \  
--out Mutect1.call_stats.txt \  
--coverage_file Mutect1.coverage.wig.txt \  
--power_file Mutect1.power.wig.txt
```

## MutSig2CV

The code for MutSig2CV is available at <https://github.com/getzlab/MutSig2CV>.

### Parameters (not explicitly included in GitHub repository):

**mergedMaf:** Somatic mutation file containing somatic mutations for all samples in the cohort

**mutationBlacklist:** list of loci in genome to blacklist from analysis (columns include: gene, chr, start, end, type, classification, ref\_allele, newbase, Protein\_Change)

**genomeBuild:** hg19

**paramsFile:** additional parameters for running MutSig2CV in tab separated text file

(impute\_full\_cov\_when\_promotes\_significance: false, max\_neighbors: 1000,

num\_neighbor\_patients: 1, qual\_min: 0.1). Documentation on how to generate this file and other available parameter options are included in the GitHub repository.

### Parameters (included as a download link in GitHub repository):

The other parameters files can be downloaded from the link listed in the “Installing” section of the GitHub repository (<http://software.broadinstitute.org/cancer/cga/sites/default/files/data/tools/mutsig/MutSig2CV.tar.gz>).

**mutationTypeDictionaryFile:** mutation\_type\_dictionary.v4.txt

**coverageModelsFile:** coverage\_models.v5a.mat

**basewiseCoverageFile:** coverage\_basewise.fwb

**targetListFile:** target\_list.hg19.v1a.txt

**contextAndEffectFwbFile:** context\_and\_effect.c65e29b.fwb

**contextAndEffectCatsegsFile:** context\_and\_effect.c65e29b.txt

**covariatesFile:** covariates\_transformed.v5a.txt

**conservationFwbFile:** conservation46.fwb

**fixedWidthBinaryJarFile:** FixedWidthBinary.jar

### **Command line code**

```
/bin/MutSig2CV \  
{mergedMaf} . \  
{mutationBlacklist} {mutationTypeDictionaryFile} \  
{coverageModelsFile} {basewiseCoverageFile} \  
{targetListFile} {contextAndEffectFwbFile} \  
{contextAndEffectCatsegsFile} {covariatesFile} \  
{conservationFwbFile} {fixedWidthBinaryJarFile} \  
{genomeBuild} {paramsFile}
```

## **GISTIC2.0**

### **Parameters:**

#### **Both**

arm\_peel: 1

broad\_length\_cutoff: 0.7

cap: 1.5

conf\_level: 0.99

do\_gene\_gistic: 0

gene\_collapse\_method: mean

join\_segment\_size: 10

markers\_file: NA (permuted markers)

max\_sample\_segs: 2000

max\_window\_var: 10000

refgene\_file:

remove\_X: 0

refgene\_file: hg19\_GENCODE\_v18\_20140127.mat

### **Tumor**

amp\_thresh: 0.1  
del\_thresh: 0.1  
qv\_thresh: 0.25  
cnv\_files: no regions

### **Normal**

amp\_thresh: 0.3  
del\_thresh: 0.3  
qv\_thresh: 0.1  
cnv\_files: all peaks from normal with  $q < 0.25$

## **Sample Realignment**

Realignment to the hg19 genome

([ftp://ftp.broadinstitute.org/pub/seq/references/Homo\\_sapiens\\_assembly19.fasta](ftp://ftp.broadinstitute.org/pub/seq/references/Homo_sapiens_assembly19.fasta)) for all samples originally aligned to GRCh37 was performed using the best practices from the GATK and Picard realignment pipeline (<https://software.broadinstitute.org/gatk/best-practices/>, <https://broadinstitute.github.io/picard/>) on FireCloud. The syntax for FireCloud variables are  $\${variable\_name}$ .

The following tasks were run for each sample that underwent realignment: Revert to SAM, Collect Quality Yield Metrics, SAM To FASTQ, BWA Alignment, Merge BAM Alignment, Mark Duplicates, Collect Multiple Metrics, Validate SAM File, Collect HS Metrics, Realigner Target Creator, Indel Realigner, GATK Base Recalibrator, GATK Print Reads.

### **Revert To SAM**

(<https://broadinstitute.github.io/picard/command-line-overview.html#RevertSam>)

```
java -Dsamjdk.buffer_size=131072 -Dsamjdk.compression_level=1 \  
-XX:GCTimeLimit=50 \  
-XX:GCHeapFreeLimit=10 \  
-Xmx4000m -jar /usr/gitc/picard.jar RevertSam \  
TMP_DIR=. \  
VALIDATION_STRINGENCY=SILENT \  
OUTPUT=${sampleName}.reverted.bam \  
INPUT=${inputBam} \  
SORT_ORDER=queryname \  

```

RESTORE\_ORIGINAL\_QUALITIES=true \  
REMOVE\_DUPLICATE\_INFORMATION=true \  
REMOVE\_ALIGNMENT\_INFORMATION=true \  
SANITIZE=true \  
MAX\_DISCARD\_FRACTION=0.01 \  
ATTRIBUTE\_TO\_CLEAR=X0 \  
ATTRIBUTE\_TO\_CLEAR=X1 \  
ATTRIBUTE\_TO\_CLEAR=XA \  
ATTRIBUTE\_TO\_CLEAR=XC \  
ATTRIBUTE\_TO\_CLEAR=XG \  
ATTRIBUTE\_TO\_CLEAR=XM \  
ATTRIBUTE\_TO\_CLEAR=XN \  
ATTRIBUTE\_TO\_CLEAR=XO \  
ATTRIBUTE\_TO\_CLEAR=XT \  
ATTRIBUTE\_TO\_CLEAR=AM \  
ATTRIBUTE\_TO\_CLEAR=AS \  
ATTRIBUTE\_TO\_CLEAR=BQ \  
ATTRIBUTE\_TO\_CLEAR=CC \  
ATTRIBUTE\_TO\_CLEAR=CP \  
ATTRIBUTE\_TO\_CLEAR=E2 \  
ATTRIBUTE\_TO\_CLEAR=H0 \  
ATTRIBUTE\_TO\_CLEAR=H1 \  
ATTRIBUTE\_TO\_CLEAR=H2 \  
ATTRIBUTE\_TO\_CLEAR=HI \  
ATTRIBUTE\_TO\_CLEAR=IH \  
ATTRIBUTE\_TO\_CLEAR=MF \  
ATTRIBUTE\_TO\_CLEAR=NH \  
ATTRIBUTE\_TO\_CLEAR=OC \  
ATTRIBUTE\_TO\_CLEAR=OP \  
ATTRIBUTE\_TO\_CLEAR=PQ \  
ATTRIBUTE\_TO\_CLEAR=R2 \  
ATTRIBUTE\_TO\_CLEAR=S2 \  
ATTRIBUTE\_TO\_CLEAR=SM \  
ATTRIBUTE\_TO\_CLEAR=SQ \  
ATTRIBUTE\_TO\_CLEAR=U2 \  
ATTRIBUTE\_TO\_CLEAR=XQ

### **Collect Quality Yield Metrics**

<https://broadinstitute.github.io/picard/command-line-overview.html#CollectQualityYieldMetrics>)

```
java -Dsamjdk.buffer_size=131072 -XX:GCTimeLimit=50 -XX:GCHeapFreeLimit=10 -Xmx128m -jar /usr/gitc/picard.jar CollectQualityYieldMetrics \
TMP_DIR=. \
I=${inputBam} \
O=${sampleName}_quality_yield_metrics.txt
```

## **SAM To FASTQ**

<https://broadinstitute.github.io/picard/command-line-overview.html#SamToFastq>)

```
java -Dsamjdk.buffer_size=131072 -Dsamjdk.use_async_io=true \
-Dsamjdk.compression_level=1 -XX:GCTimeLimit=50 -XX:GCHeapFreeLimit=10 -Xmx256m \
-jar /usr/gitc/picard.jar SamToFastq \
TMP_DIR=. \
INPUT=${inputBam} \
FASTQ=${sampleName}.1.fastq.gz \
INTERLEAVE=false \
SECOND_END_FASTQ=${sampleName}.2.fastq.gz \
INCLUDE_NON_PF_READS=true \
CLIPPING_ATTRIBUTE=XT \
CLIPPING_ACTION=2 \
UNPAIRED_FASTQ=${sampleName}.unpaired.fastq.gz
```

## **BWA Alignment**

0.5.9-r16 (patched by AW, and multithread samse/sampe patch applied -

<https://sourceforge.net/p/bio-bwa/mailman/bio-bwa-help/thread/50B8FD2D.7030608@mail.mcgill.ca/>)

```
/usr/gitc/bwa-0.5.9/bwa index -a bwtsv ${refFasta}
```

```
/usr/gitc/bwa-0.5.9/bwa aln ${refFasta} -q 5 -l 32 -k 2 -o 1 -t ${cpu} -f
${sampleName}.Homo_sapiens_assembly19.1.sai ${firstEndFastq}
```

```
/usr/gitc/bwa-0.5.9/bwa aln ${refFasta} -q 5 -l 32 -k 2 -o 1 -t ${cpu} -f
${sampleName}.Homo_sapiens_assembly19.2.sai ${secondEndFastq}
```

```
/usr/gitc/bwa-0.5.9/bwa aln ${refFasta} -q 5 -l 32 -k 2 -o 1 -t ${cpu} -f  
${sampleName}.Homo_sapiens_assembly19.unpaired.sai ${unpairedFastq}
```

```
/usr/gitc/bwa-0.5.9/bwa sampe -P -f  
${sampleName}.Homo_sapiens_assembly19.aligned_bwa.sam ${refFasta}  
${sampleName}.Homo_sapiens_assembly19.1.sai  
${sampleName}.Homo_sapiens_assembly19.2.sai ${firstEndFastq} ${secondEndFastq}
```

```
/usr/gitc/bwa-0.5.9/bwa samse -f  
${sampleName}.Homo_sapiens_assembly19.unpaired.aligned_bwa.sam ${refFasta}  
${sampleName}.Homo_sapiens_assembly19.unpaired.sai ${unpairedFastq}
```

### **Merge BAM Alignment**

<https://broadinstitute.github.io/picard/command-line-overview.html#MergeBamAlignment>

```
java -Dsamjdk.buffer_size=131072 -Dsamjdk.compression_level=1 -XX:+UseStringCache -  
XX:GCTimeLimit=50 -XX:GCHeapFreeLimit=10 -Xmx5000m -jar /usr/gitc/picard.jar  
MergeBamAlignment \  
TMP_DIR=. \  
VALIDATION_STRINGENCY=SILENT \  
CREATE_INDEX=true \  
ALIGNED_BAM=${alignedBam} \  
ALIGNED_BAM=${unpairedAlignedBam} \  
EXPECTED_ORIENTATIONS=FR \  
ATTRIBUTES_TO_RETAIN=X0 \  
UNMAPPED_BAM=${unmappedBam} \  
OUTPUT=${sampleName}.merged.aligned.bam \  
REFERENCE_SEQUENCE=${refFasta} \  
PAIRED_RUN=true \  
IS_BISULFITE_SEQUENCE=false \  
ALIGNED_READS_ONLY=false \  
CLIP_ADAPTERS=false \  
MAX_RECORDS_IN_RAM=2000000 \  
ADD_MATE_CIGAR=true
```

### **Mark Duplicates**

<https://broadinstitute.github.io/picard/command-line-overview.html#MarkDuplicates>

```
java -Dsamjdk.buffer_size=131072 -XX:GCTimeLimit=50 -XX:GCHeapFreeLimit=10 -Xmx4000m -jar /usr/gitc/picard.jar MarkDuplicates \  
TMP_DIR=. \  
CREATE_INDEX=true \  
CREATE_MD5_FILE=true \  
INPUT=${inputBam} \  
OUTPUT=${sampleName}.aligned.duplicates_marked.bam \  
METRICS_FILE=${sampleName}.duplicate_metrics \  
VALIDATION_STRINGENCY=SILENT \  
OPTICAL_DUPLICATE_PIXEL_DISTANCE=2500 \  
READ_ONE_BARCODE_TAG=RX
```

### **Collect Multiple Metrics**

<https://broadinstitute.github.io/picard/command-line-overview.html#CollectMultipleMetrics>)

```
java -Dsamjdk.buffer_size=131072 -XX:GCTimeLimit=50 -XX:GCHeapFreeLimit=10 \  
-Xmx4000m -jar /usr/gitc/picard.jar CollectMultipleMetrics \  
TMP_DIR=. \  
METRIC_ACCUMULATION_LEVEL=null \  
METRIC_ACCUMULATION_LEVEL=ALL_READS \  
PROGRAM=null \  
PROGRAM=MeanQualityByCycle \  
PROGRAM=QualityScoreDistribution \  
PROGRAM=CollectInsertSizeMetrics \  
PROGRAM=CollectAlignmentSummaryMetrics \  
INPUT=${inputBam} \  
REFERENCE_SEQUENCE=${refFasta} \  
ASSUME_SORTED=true \  
OUTPUT=${sampleName}.multiple_metrics.bam
```

### **Validate SAM File**

<https://broadinstitute.github.io/picard/command-line-overview.html#ValidateSamFile>)

```
java -Dsamjdk.buffer_size=131072 -XX:GCTimeLimit=50 -XX:GCHeapFreeLimit=10 -Xmx4000m -jar /usr/gitc/picard.jar ValidateSamFile \  
TMP_DIR=. \  
CREATE_MD5_FILE=false \  
I=${inputBam} \  
O=${outputSam}
```



```
O=${sampleName}.validation_metrics \  
REFERENCE_SEQUENCE=${refFasta} \  
MODE=SUMMARY \  
IS_BISULFITE_SEQUENCED=false \  
INDEX_VALIDATION_STRINGENCY=LESS_EXHAUSTIVE
```

### **Collect HS Metrics**

<https://broadinstitute.github.io/picard/command-line-overview.html#CollectHsMetrics>

```
java -Dsamjdk.buffer_size=131072 -XX:GCTimeLimit=50 -XX:GCHeapFreeLimit=10 \  
-Xmx1500m -jar /usr/gitc/picard.jar CollectHsMetrics \  
TMP_DIR=. \  
INPUT=${inputBam} \  
OUTPUT=${sampleName}.hybrid_selection_metrics \  
REFERENCE_SEQUENCE=${refFasta} \  
TARGET_INTERVALS=${targetIntervalList} \  
BAIT_INTERVALS=${baitIntervalList}
```

### **Realigner Target Creator**

[https://software.broadinstitute.org/gatk/documentation/tooldocs/3.8-0/org\\_broadinstitute\\_gatk\\_tools\\_walkers\\_indels\\_RealignerTargetCreator.php](https://software.broadinstitute.org/gatk/documentation/tooldocs/3.8-0/org_broadinstitute_gatk_tools_walkers_indels_RealignerTargetCreator.php)

```
java -Djava.io.tmpdir=/directory -XX:GCTimeLimit=50 -XX:GCHeapFreeLimit=10 -  
Xmx4000m -jar /usr/GenomeAnalysisTK.jar -T RealignerTargetCreator \  
--disable_auto_index_creation_and_locking_when_reading_rods \  
-R ${refFasta} \  
-o ${sampleName}.indelrealigner.target.intervals \  
-I ${nameBase}.bam -dcov 250 -nt 1 \  
--known ${dbSnpVcf} \  
--known ${knownIndelVcf} \  
--known ${goldStandardVcf}
```

### **Indel Realigner**

[https://software.broadinstitute.org/gatk/documentation/tooldocs/3.8-0/org\\_broadinstitute\\_gatk\\_tools\\_walkers\\_indels\\_IndelRealigner.php](https://software.broadinstitute.org/gatk/documentation/tooldocs/3.8-0/org_broadinstitute_gatk_tools_walkers_indels_IndelRealigner.php)

```
java -jar /usr/GenomeAnalysisTK.jar -T IndelRealigner \  
-R ${refFasta} \  
-I ${nameBase}.bam
```

```
-known ${dbSnpcVcf} \  
-known ${knownIndelVcf} \  
-known ${goldStandardVcf} \  
-targetIntervals ${indelRealignmentTargets} \  
-o ${sampleName}.indel_realigned.bam \  
--consensusDeterminationModel KNOWN_ONLY \  
-LOD 0.4
```

### **GATK Base Recalibrator**

[https://software.broadinstitute.org/gatk/documentation/tooldocs/3.8-0/org\\_broadinstitute\\_gatk\\_tools\\_walkers\\_bqsr\\_BaseRecalibrator.php](https://software.broadinstitute.org/gatk/documentation/tooldocs/3.8-0/org_broadinstitute_gatk_tools_walkers_bqsr_BaseRecalibrator.php)

```
java -Djava.io.tmpdir=/directory -XX:GCTimeLimit=50 -XX:GCHeapFreeLimit=10 -  
Xmx4000m -jar /usr/GenomeAnalysisTK.jar -T BaseRecalibrator \  
--disable_auto_index_creation_and_locking_when_reading_rods -U \  
-R ${refFasta} \  
-I ${nameBase}.bam \  
--useOriginalQualities \  
-o ${sampleName}.recal_data.csv \  
-knownSites ${dbSnpcVcf} \  
-knownSites ${knownIndelVcf} \  
-knownSites ${goldStandardVcf}
```

### **GATK Print Reads**

[https://software.broadinstitute.org/gatk/documentation/tooldocs/3.8-0/org\\_broadinstitute\\_gatk\\_tools\\_walkers\\_readutils\\_PrintReads.php](https://software.broadinstitute.org/gatk/documentation/tooldocs/3.8-0/org_broadinstitute_gatk_tools_walkers_readutils_PrintReads.php)

```
java -Djava.io.tmpdir=/directory -Dsamjdk.use_async_io=true -XX:GCTimeLimit=50 -  
XX:GCHeapFreeLimit=10 -Xmx8000m -jar /usr/GenomeAnalysisTK.jar -T PrintReads \  
--disable_auto_index_creation_and_locking_when_reading_rods \  
--generate_md5 -U \  
-R ${refFasta} \  
-I ${nameBase}.bam \  
--useOriginalQualities \  
-o ${sampleName}.realigned.hg19.bam \  
--disable_indel_qual \  
-BQSR ${recalData} \  
--emit_original_qual
```
